# Supplementary material for: Lead-free MnII-based red-emitting hybrid halide (CH6N3)2MnCl4 toward high performance warm WLEDs
Source: Royal Society of Chemistry journal article supplement (doi:10.1039/d1tc00632k), 2021-01-01
Supplement: d1tc00632k1.pdf [file d1tc00632k1.pdf]

## Supporting Information

### Lead-free Mn<sup>II</sup>-based Red-emitting Hybrid Halide

### (CH<sub>6</sub>N<sub>3</sub>)<sub>2</sub>MnCl<sub>4</sub> toward High Performance Warm WLEDs

Shiyi Wang,<sup>a</sup> Xinxin Han,<sup>\*a</sup> Tongtong Kou,<sup>a</sup> Yayun Zhou,<sup>b</sup> Yi Liang,<sup>a</sup> Zixuan Wu,<sup>a</sup>

Jialuo Huang,<sup>a</sup> Tong Chang,<sup>a</sup> Chengyu Peng,<sup>a</sup> Qilin Wei,<sup>a</sup> Bingsuo Zou<sup>\*a</sup>

<sup>a</sup> School of Physical Science and Technology, MOE Key Laboratory of New Processing Technology for Non-ferrous Metals and Materials, Guangxi Key Laboratory of Processing for Non-ferrous Metals and Featured Materials, Guangxi University, Nanning 530004, China.

<sup>b</sup> State Key Laboratory of Luminescent Materials and Devices, Guangdong Provincial Key Laboratory of Fiber Laser Materials and Applied Techniques, South China University of Technology, Guangzhou 510641, China.

#### Experimental section

##### Materials and Chemicals

The raw materials manganese(II) chloride tetrahydrate (MnCl<sub>2</sub>·4H<sub>2</sub>O, 99%, Aladdin), guanidine hydrochloride (CH<sub>6</sub>N<sub>3</sub>Cl, AR, Xilong Chemical Co., Ltd., China), zinc chloride (ZnCl<sub>2</sub>, 99.0%, Aladdin), hydrochloric acid (HCl, 36–38wt.% in water, Beijing Chemical Works), and absolute ethanol (AR, Beijing Tongguang Fine Chemical Co., Ltd., China) were purchased and used as received without further purification.

##### Synthesis

The polycrystalline samples (CH<sub>6</sub>N<sub>3</sub>)<sub>2</sub>MnCl<sub>4</sub> and Zn<sup>2+</sup>-doped (CH<sub>6</sub>N<sub>3</sub>)<sub>2</sub>MnCl<sub>4</sub> were synthesized by a facile mechanochemical method through manual grinding in an agate mortar. For the preparation of (CH<sub>6</sub>N<sub>3</sub>)<sub>2</sub>MnCl<sub>4</sub>, 1 mmol MnCl<sub>2</sub>·4H<sub>2</sub>O and 2 mmol of CN<sub>3</sub>H<sub>6</sub>Cl were put into an agate mortar and ground with a pestle. The powder rapidly exhibited red fluorescence with continuous grinding under the irradiation of 365 nm

ultraviolet (UV) lamp. In order to ensure the complete reaction of raw materials, the powder was thoroughly ground for several minutes. The  $\text{Zn}^{2+}$  doped samples were prepared by the similar procedure besides the addition of certain amount of  $\text{ZnCl}_2$  to replace the same amount of  $\text{MnCl}_2 \cdot 4\text{H}_2\text{O}$ .

### **Fabrication of WLEDs**

WLEDs were fabricated by combining high-power COB blue InGaN chips (~450 nm, 300 mA, 10 W), commercial  $\text{Y}_3\text{Al}_5\text{O}_{12}:\text{Ce}^{3+}$  (YAG: $\text{Ce}^{3+}$ ) yellow phosphor and the as-prepared  $(\text{CH}_6\text{N}_3)_2\text{MnCl}_4$  or  $(\text{CN}_3\text{H}_6)_2\text{Mn}_{0.92}\text{Zn}_{0.08}\text{Cl}_4$  phosphor. The phosphors were mixed with epoxy resin thoroughly, and coated on the surface of the COB chips to produce WLEDs.

### **Measurement and Characterization**

Room-temperature (RT) X-ray Diffraction (XRD) measurements were carried out using a SMARTLAB 3KW Diffractometer with  $\text{Cu K}\alpha$  ( $\lambda = 1.5406 \text{ \AA}$ ) radiation. The Rietveld method was employed to perform the structure refinement by program General Structure Analysis System (GSAS).<sup>1</sup> Temperature-dependent XRD spectra were carried out on a Bruker D8 Diffractometer in the temperature range of 140-360 K with an interval of 20 K. Raman spectra were carried out using WITec alpha300R Raman spectrometer with a 325 nm laser. The thermal stability of the sample was measured on a differential thermogravimetric (TGA) analyzer (DTG-60H) from RT to 800°C under nitrogen atmosphere. The morphology and elemental composition were performed using a field emission scanning electron microscope (SEM, Sigma 500) equipped with energy dispersive X-ray spectroscopy (EDS). The photoluminescence excitation (PLE), photoluminescence (PL) spectra, PL decay curves and PL quantum yields (PLQYs) were measured by a Horiba Jobin Yvon Fluorolog-3 fluorescence spectrophotometer equipped with a 450 W Xenon lamp or a  $\mu\text{s}$  flash lamp as the excitation source as well as the high and low temperature test system. The absorption spectra were measured by UV-vis spectrophotometer (PerkinElmer Instruments, Lambda 750). The upconversion spectrum was recorded on an Edinburgh FLS1000 fluorescence spectrometer equipped with a 980 nm femtosecond laser. The magnetic

property was measured by a vibration sample magnetometer (VSM) (Lakeside,7410). The photoelectric properties of the as-fabricated pc-WLEDs, including the EL spectrum, luminous efficacy (LE), color rendering index (CRI), correlated color temperature (CCT), and Commission Internationale de L'Eclairage (CIE) chromaticity coordinate, were measured using a ATA-1000 (Everfine, China) optoelectronic analyzer.

**Table S1** Rietveld refinement data for  $(\text{CH}_6\text{N}_3)_2\text{MnCl}_4$ .

| formula             | $(\text{CH}_6\text{N}_3)_2\text{MnCl}_4$ |
|---------------------|------------------------------------------|
| space group         | $P2_1/c$                                 |
| a (Å)               | 8.66306(18)                              |
| b (Å)               | 27.07211(20)                             |
| c (Å)               | 15.63008(17)                             |
| $\alpha$ (°)        | 90                                       |
| $\beta$ (°)         | 93.1929(20)                              |
| $\gamma$ (°)        | 90                                       |
| Z                   | 12                                       |
| V (Å <sup>3</sup> ) | 3659.99(9)                               |
| R <sub>wp</sub> (%) | 5.45                                     |
| R <sub>p</sub> (%)  | 4.19                                     |
| $\chi^2$            | 1.607                                    |

Note: The refinements are stable and give low R-factors.

**Table S2** Average bond lengths (Å) and distortion index of MnCl<sub>6</sub> octahedron in (CH<sub>6</sub>N<sub>3</sub>)<sub>2</sub>MnCl<sub>4</sub>

| <b>bond</b>                     | <b>bond length (Å)</b> |
|---------------------------------|------------------------|
| Mn1-Cl1                         | 2.257(12)              |
| Mn1-Cl2                         | 2.593(11)              |
| Mn1-Cl3                         | 2.506(12)              |
| Mn1-Cl4                         | 2.816(12)              |
| Mn1-Cl5                         | 2.987(11)              |
| Mn1-Cl6                         | 2.721(10)              |
| Mn2-Cl4                         | 2.528(13)              |
| Mn2-Cl5                         | 2.505(12)              |
| Mn2-Cl6                         | 2.695(12)              |
| Mn2-Cl7                         | 2.737(12)              |
| Mn2-Cl8                         | 2.584(12)              |
| Mn2-Cl9                         | 2.720(14)              |
| Mn3-Cl7                         | 2.856(11)              |
| Mn3-Cl8                         | 2.823(11)              |
| Mn3-Cl9                         | 2.706(13)              |
| Mn3-Cl10                        | 2.665(12)              |
| Mn3-Cl11                        | 2.505(9)               |
| Mn3-Cl12                        | 2.485(13)              |
| <b>average bond lengths (Å)</b> | <b>2.6494</b>          |
| <b>distortion index</b>         | <b>0.05167</b>         |

The distortion index of the MnCl<sub>6</sub> octahedron is calculated by using the following equation <sup>2</sup>:

$$D = \frac{1}{n} \sum_{i=1}^n \frac{|l_i - l_{av}|}{l_{av}}$$

where  $l_i$  is the distance from the central atom to the  $i$ th coordinating atom and  $l_{av}$  is the average bond length.

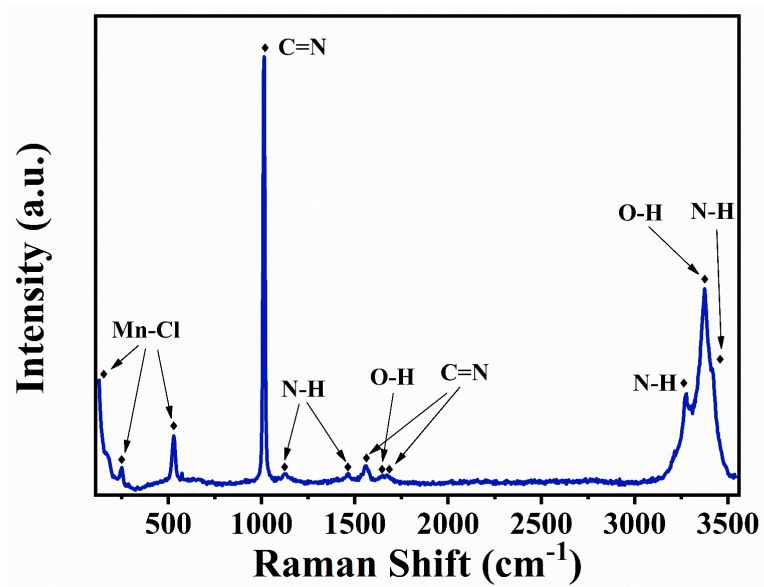

Fig. S1 Raman spectrum of  $(\text{CH}_6\text{N}_3)_2\text{MnCl}_4$ .

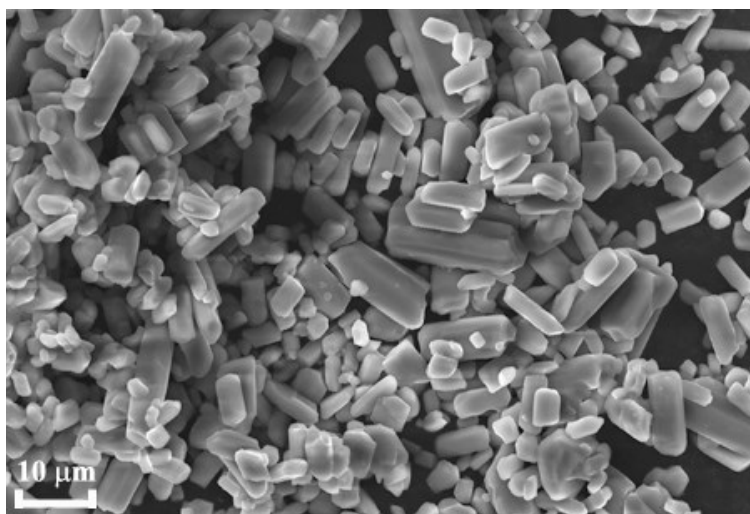

**Fig. S2** SEM image of  $(\text{CH}_6\text{N}_3)_2\text{MnCl}_4$  powder crystal.

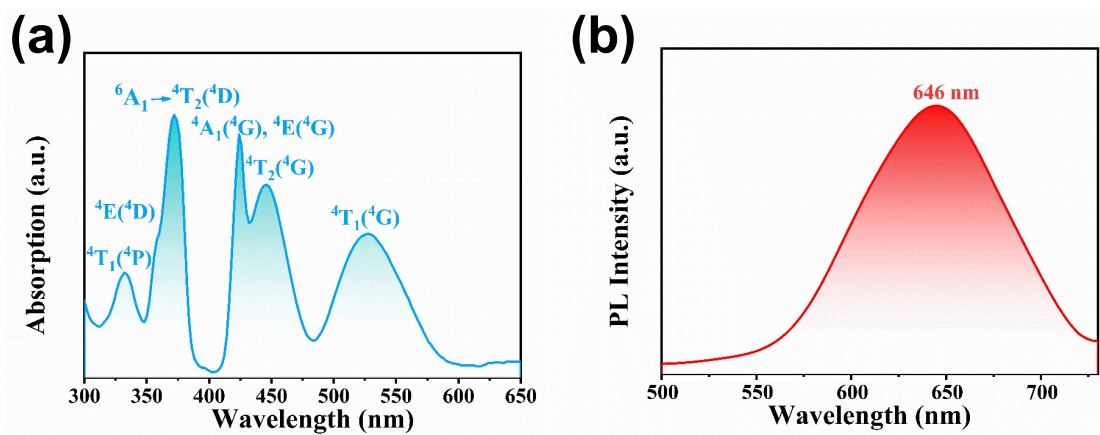

**Fig. S3** (a) Absorption spectrum of  $(\text{CH}_6\text{N}_3)_2\text{MnCl}_4$ . (b) Upconversion spectrum of  $(\text{CH}_6\text{N}_3)_2\text{MnCl}_4$  upon excitation of 980 nm femtosecond laser.



**Table S3** Luminescent parameters of some reported Mn<sup>2+</sup>-based halides.

| <b>Chemical formula</b>                                                                               | <b>Peak position (nm)</b> | <b>Lifetime</b> | <b>PLQY</b> | <b>Ref.</b>        |
|-------------------------------------------------------------------------------------------------------|---------------------------|-----------------|-------------|--------------------|
| (C <sub>10</sub> H <sub>16</sub> N) <sub>2</sub> Zn <sub>1-x</sub> Mn <sub>x</sub> Br <sub>4</sub>    | 518                       | 0.33 ms         | 0-88.75%    | Ref. <sup>3</sup>  |
| (Pyrrolidinium)MnBr                                                                                   | 640                       | 157 μs          | —           | Ref. <sup>4</sup>  |
| (Pyrrolidinium)MnCl <sub>3</sub>                                                                      | 640                       | 515 μs          | 53.6%       | Ref. <sup>5</sup>  |
| [(CH <sub>2</sub> ) <sub>4</sub> N(CH <sub>2</sub> ) <sub>4</sub> ] <sub>2</sub> [MnBr <sub>4</sub> ] | 525                       | —               | 13.07%      | Ref. <sup>6</sup>  |
| [(CH <sub>3</sub> ) <sub>3</sub> NH] <sub>3</sub> (MnBr <sub>3</sub> )(MnBr <sub>4</sub> )            | 507, 609                  | 281.7 μs        | 41.96%      | Ref. <sup>7</sup>  |
| C <sub>4</sub> H <sub>10</sub> NMnBr <sub>3</sub>                                                     | 628                       | 1.44 ns         | 46%         | Ref. <sup>8</sup>  |
| C <sub>8</sub> H <sub>20</sub> N <sub>2</sub> MnBr <sub>4</sub>                                       | 520                       | 3.97 ns         | 19%         | Ref. <sup>8</sup>  |
| C <sub>5</sub> H <sub>6</sub> NMnCl <sub>5</sub> ·H <sub>2</sub> O                                    | 518                       | 1.49 ns         | —           | Ref. <sup>9</sup>  |
| C <sub>10</sub> H <sub>12</sub> N <sub>2</sub> MnCl <sub>4</sub>                                      | 620                       | 2.14 ns         | —           | Ref. <sup>9</sup>  |
| C <sub>10</sub> H <sub>12</sub> N <sub>2</sub> MnBr <sub>4</sub>                                      | 523                       | 213 μs          | —           | Ref. <sup>10</sup> |
| C <sub>5</sub> H <sub>6</sub> NMnBr <sub>3</sub>                                                      | 650                       | —               | —           | Ref. <sup>10</sup> |
| DBFDPO-MnBr <sub>2</sub>                                                                              | 550                       | 1 ms            | 81.4%       | Ref. <sup>11</sup> |
| DBFDPO-MnCl <sub>2</sub>                                                                              | 532                       | 5.3 ms          | 33.3%       | Ref. <sup>11</sup> |
| (3-Pyrrolinium)MnCl <sub>3</sub>                                                                      | 635                       | 333.6 μs        | 28.22%      | Ref. <sup>12</sup> |
| [(C <sub>7</sub> H <sub>10</sub> N) <sub>2</sub> ][MnCl <sub>4</sub> ]                                | 520                       | 384.43 μs       | 82%         | Ref. <sup>13</sup> |
| [(C <sub>7</sub> H <sub>10</sub> N) <sub>2</sub> ][MnBr <sub>4</sub> ]                                | 515                       | 187.83 μs       | 12%         | Ref. <sup>13</sup> |
| (Bz(Me) <sub>3</sub> N) <sub>2</sub> MnX <sub>4</sub><br>(X = Cl, Br, I)                              | 500-550                   | 72-380 μs       | 70-90%      | Ref. <sup>14</sup> |
| C <sub>4</sub> H <sub>12</sub> NMnCl <sub>3</sub>                                                     | 635                       | 758.95 μs       | 91.8%       | Ref. <sup>15</sup> |
| (C <sub>8</sub> H <sub>20</sub> N) <sub>2</sub> MnBr <sub>4</sub>                                     | 515                       | 442.52 μs       | 85.1%       | Ref. <sup>15</sup> |
| Cs <sub>3</sub> MnBr <sub>5</sub>                                                                     | 520                       | 0.29 ms         | 49%         | Ref. <sup>16</sup> |
| (C <sub>6</sub> H <sub>16</sub> N) <sub>2</sub> MnBr <sub>4</sub>                                     | 525                       | 1.44 ns         | 62.2%       | Ref. <sup>17</sup> |
| (C <sub>9</sub> H <sub>20</sub> N) <sub>2</sub> MnBr <sub>4</sub>                                     | 528                       | 325.57 μs       | 81.08%      | Ref. <sup>18</sup> |
| (C <sub>24</sub> H <sub>20</sub> P) <sub>2</sub> MnBr <sub>4</sub>                                    | 522                       | 317 μs          | 98%         | Ref. <sup>19</sup> |

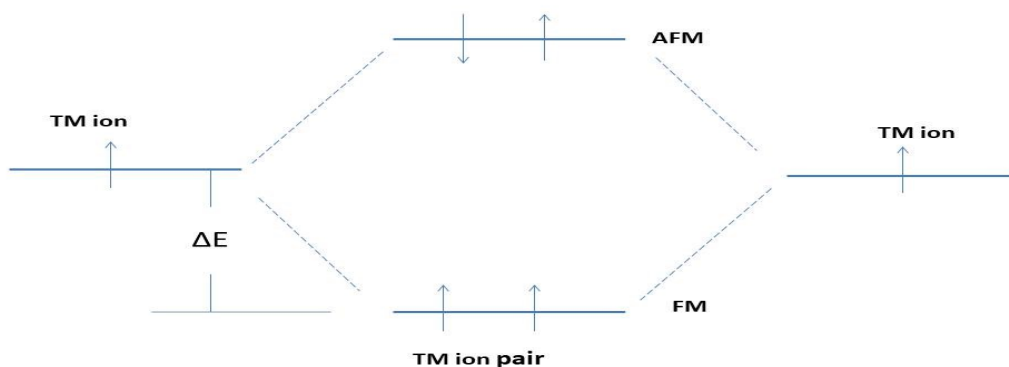

The d-d transition in a TM compound is thought of as a Frenkel exciton. when TM ions approach each other, their energy may be modified by the formation of paired Frenkel exciton due to their spin coupling type. The separation between TM ions is related to the pair formation energy in this system, whose length larger than critical value of 6.6Å will destroy this pair.

Fig. S4 The spin-spin interaction between transition metal(TM) ion in a TM compound and their d-d transition energy. The  $\Delta E$  above is the energy  $E_{sc}$  of spin-spin coupling between TM ions, whose value is .

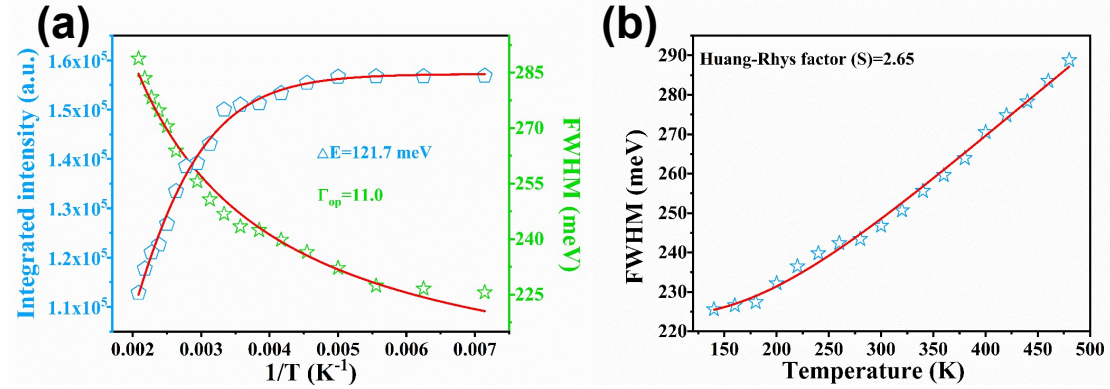

**Fig. S5** (a) Integrated intensity and FWHM and the corresponding fitting curves versus temperature. For the integrated intensity, the activation energy  $\Delta E$  is calculated by fitting the formula of  $I_T = I_0 / (1 + Ae^{-\Delta E/kT})$ , where  $A$  is a constant,  $k$  is the Boltzmann constant. For FWHM, the electron-optical phonon coupling energy  $\Gamma_{op}$  is calculated by fitting the formula of  $\Gamma(T) = \Gamma_0 + \Gamma_{op} / (e^{\hbar\omega/kT} - 1)$ , where  $\Gamma_0$  is the intrinsic line width at absolute temperature 0 K,  $\hbar\omega$  is the maximum phonon energy. (b) Fitting curve of the FWHM as a function of temperature via the formula of  $FWHM(T) = \sqrt{8 \ln 2} \times \hbar\omega \times \sqrt{S} \times \sqrt{\coth(\hbar\omega / 2kT)}$  to obtain the Huang-Phys factor  $S$ .

**Table S4** Photometric and Chromaticity parameters of the fabricated WLEDs.

| Device                        | Current (mA) | CIE coordinates |        | CCT (K) | Ra   | Efficacy (lm/W) |
|-------------------------------|--------------|-----------------|--------|---------|------|-----------------|
|                               |              | X               | Y      |         |      |                 |
| <b>LED-1</b><br><b>(0%Zn)</b> | 20           | 0.3811          | 0.3693 | 3925    | 94.1 | 67.56           |
|                               | 60           | 0.3801          | 0.3665 | 3930    | 94.3 | 67.83           |
|                               | 120          | 0.3800          | 0.3669 | 3936    | 95   | 67.41           |
|                               | 180          | 0.3808          | 0.3684 | 3926    | 95.5 | 65.7            |
|                               | 240          | 0.3806          | 0.3689 | 3934    | 95.7 | 63.87           |
|                               | 300          | 0.3806          | 0.3694 | 3939    | 95.9 | 61.23           |
| <b>LED-2</b><br><b>(8%Zn)</b> | 20           | 0.3784          | 0.3673 | 3984    | 93.7 | 91.41           |
|                               | 60           | 0.3802          | 0.3695 | 3952    | 94.1 | 89.14           |
|                               | 120          | 0.3820          | 0.3718 | 3919    | 94.4 | 83.98           |
|                               | 180          | 0.3839          | 0.3740 | 3886    | 94.3 | 79.40           |
|                               | 240          | 0.3861          | 0.3766 | 3848    | 94.1 | 74.57           |
|                               | 300          | 0.3875          | 0.3785 | 3825    | 93.9 | 70.19           |
| <b>LED-3</b><br><b>(0%Zn)</b> | 20           | 0.3392          | 0.3360 | 5193    | 96   | 96.07           |
|                               | 60           | 0.3399          | 0.3373 | 5166    | 96.3 | 94.37           |
|                               | 120          | 0.3408          | 0.3388 | 5135    | 96.4 | 89.25           |
|                               | 180          | 0.3415          | 0.3402 | 5108    | 96.2 | 84.81           |
|                               | 240          | 0.3420          | 0.3413 | 5089    | 95.9 | 80.56           |
|                               | 300          | 0.3422          | 0.3418 | 5084    | 95.7 | 76.59           |
| <b>LED-4</b><br><b>(8%Zn)</b> | 20           | 0.3409          | 0.3408 | 5132    | 95.1 | 107.49          |
|                               | 60           | 0.3416          | 0.3417 | 5110    | 95.3 | 104.78          |
|                               | 120          | 0.3426          | 0.3431 | 5070    | 95.2 | 99.28           |
|                               | 180          | 0.3432          | 0.3439 | 5048    | 95.1 | 94.16           |
|                               | 240          | 0.3439          | 0.3448 | 5023    | 94.9 | 89.31           |
|                               | 300          | 0.3447          | 0.3459 | 4996    | 94.7 | 84.58           |
| <b>LED-5</b><br><b>(0%Zn)</b> | 20           | 0.3181          | 0.3371 | 6175    | 89.6 | 120.12          |
|                               | 60           | 0.3185          | 0.3377 | 6154    | 89.5 | 117.73          |
|                               | 120          | 0.3192          | 0.3388 | 6114    | 89.2 | 111.50          |
|                               | 180          | 0.3198          | 0.3398 | 6083    | 88.8 | 105.87          |
|                               | 240          | 0.3201          | 0.3404 | 6067    | 88.5 | 100.28          |
|                               | 300          | 0.3201          | 0.3402 | 6067    | 88.5 | 94.81           |
| <b>LED-6</b><br><b>(8%Zn)</b> | 20           | 0.3184          | 0.3347 | 6175    | 92.4 | 122.98          |
|                               | 60           | 0.3206          | 0.3380 | 6049    | 92   | 121.44          |
|                               | 120          | 0.3229          | 0.3411 | 5931    | 91.5 | 119.9           |
|                               | 180          | 0.3247          | 0.3436 | 5843    | 90.9 | 108.94          |
|                               | 240          | 0.3263          | 0.3460 | 5769    | 90.4 | 102.94          |
|                               | 300          | 0.3283          | 0.3487 | 5680    | 89.8 | 96.69           |

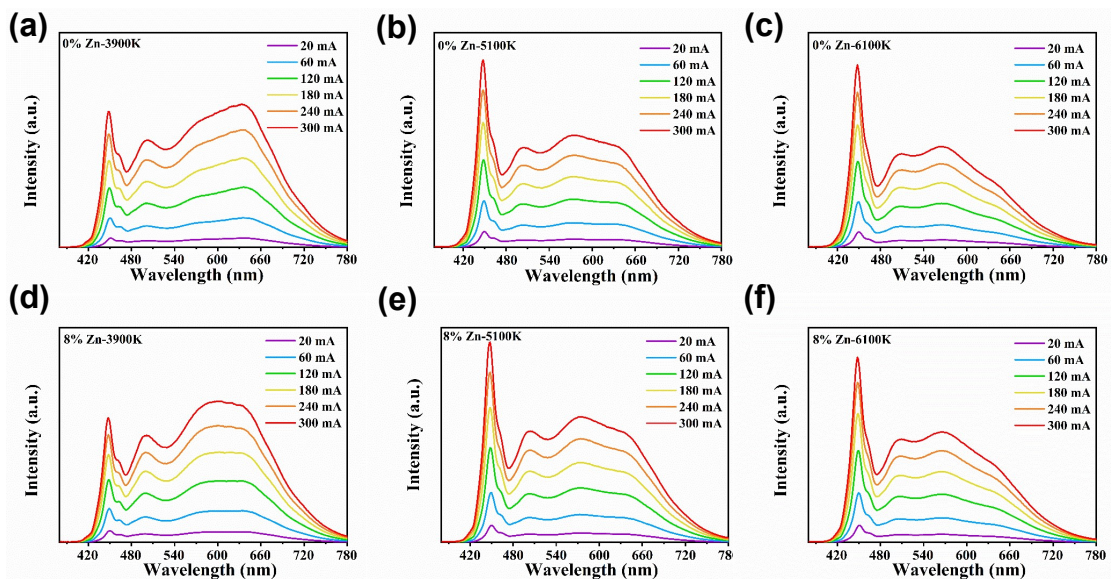

**Fig. S6** Drive current dependent electroluminescence spectra of WLED devices with different CCT fabricated with the as-synthesized red-emitting hybrid halides  $(\text{CH}_6\text{N}_3)_2\text{MnCl}_4$  or  $(\text{CH}_6\text{N}_3)_2\text{MnCl}_4:8\%\text{Zn}^{2+}$  and the commercial yellow phosphor  $\text{YAG}:\text{Ce}^{3+}$  on a blue InGaN chip: (a-c) WLED devices fabricated by  $(\text{CH}_6\text{N}_3)_2\text{MnCl}_4$  with CCT of  $\sim 3900$ ,  $5100$  and  $6100$  K, respectively. (d-f) WLED devices fabricated by  $(\text{CH}_6\text{N}_3)_2\text{MnCl}_4:8\%\text{Zn}^{2+}$  with CCT of  $\sim 3900$ ,  $5100$  and  $6100$  K, respectively.

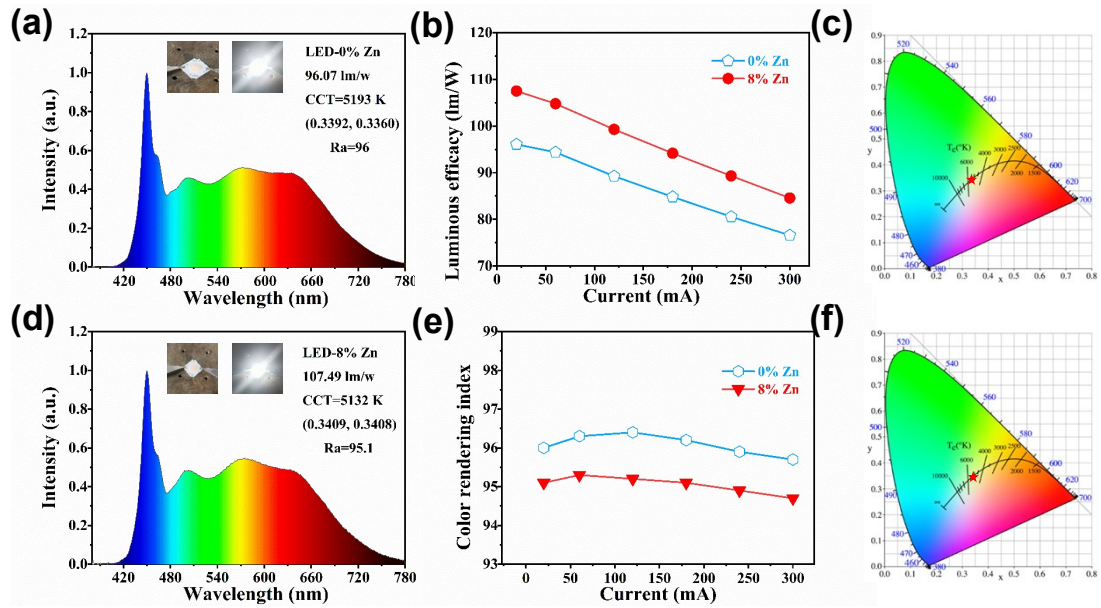

**Fig. S7** (a and d) Electroluminescence spectra of the WLED devices with CCT of  $\sim 5100$  K fabricated with the as-synthesized red-emitting hybrid halides  $(\text{CH}_6\text{N}_3)_2\text{MnCl}_4$ ,  $(\text{CH}_6\text{N}_3)_2\text{MnCl}_4:8\%\text{Zn}^{2+}$  and the commercial yellow phosphor YAG:Ce<sup>3+</sup> on a blue InGaN chip under a driven current of 20 mA, respectively. The inset shows the photographs of the as-fabricated and lightened WLED. (b) Comparison of drive current dependent luminous efficacy of the WLEDs fabricated by  $(\text{CH}_6\text{N}_3)_2\text{MnCl}_4$  and  $(\text{CH}_6\text{N}_3)_2\text{MnCl}_4:8\%\text{Zn}^{2+}$ . (e) Comparison of drive current dependent color rendering index of the WLEDs fabricated by  $(\text{CH}_6\text{N}_3)_2\text{MnCl}_4$  and  $(\text{CH}_6\text{N}_3)_2\text{MnCl}_4:8\%\text{Zn}^{2+}$ . (c and f) CIE chromaticity coordinates of the WLEDs fabricated by  $(\text{CH}_6\text{N}_3)_2\text{MnCl}_4$  and  $(\text{CH}_6\text{N}_3)_2\text{MnCl}_4:8\%\text{Zn}^{2+}$ , respectively.

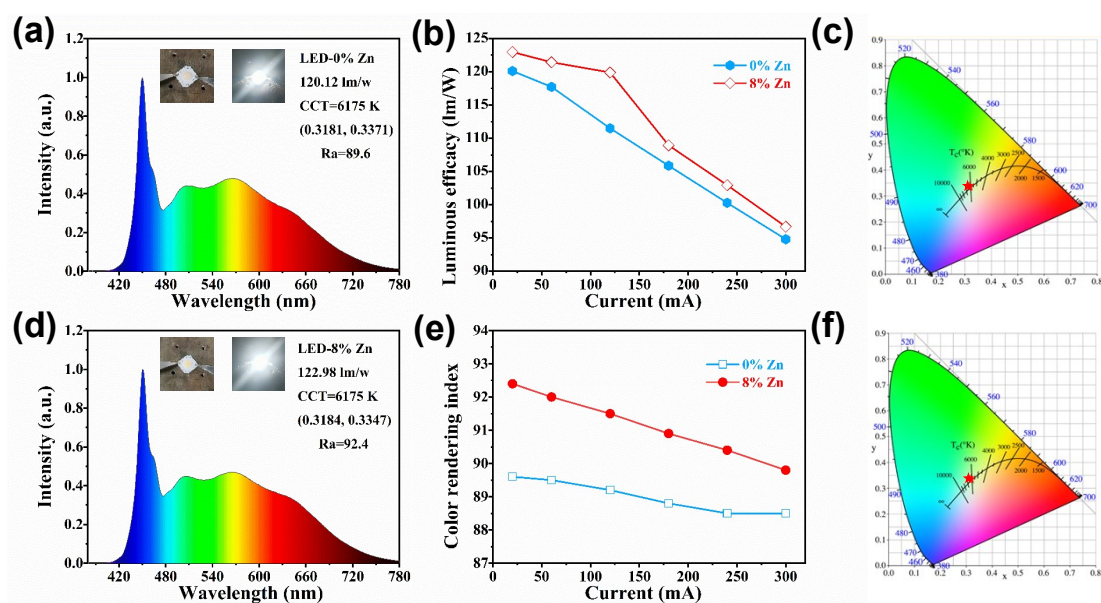

**Fig. S8** (a and d) Electroluminescence spectra of the WLED devices with CCT of  $\sim 6100$  K fabricated with the as-synthesized red-emitting hybrid halides  $(\text{CH}_6\text{N}_3)_2\text{MnCl}_4$ ,  $(\text{CH}_6\text{N}_3)_2\text{MnCl}_4:8\%\text{Zn}^{2+}$  and the commercial yellow phosphor YAG:Ce<sup>3+</sup> on a blue InGaN chip under a driven current of 20 mA, respectively. The inset shows the photographs of the as-fabricated and lightened WLED. (b) Comparison of drive current dependent luminous efficacy of the WLEDs fabricated by  $(\text{CH}_6\text{N}_3)_2\text{MnCl}_4$  and  $(\text{CH}_6\text{N}_3)_2\text{MnCl}_4:8\%\text{Zn}^{2+}$ . (e) Comparison of drive current dependent color rendering index of the WLEDs fabricated by  $(\text{CH}_6\text{N}_3)_2\text{MnCl}_4$  and  $(\text{CH}_6\text{N}_3)_2\text{MnCl}_4:8\%\text{Zn}^{2+}$ . (c and f) CIE chromaticity coordinates of the WLEDs fabricated by  $(\text{CH}_6\text{N}_3)_2\text{MnCl}_4$  and  $(\text{CH}_6\text{N}_3)_2\text{MnCl}_4:8\%\text{Zn}^{2+}$ , respectively.

## References

1. B. H. Toby, *J. Appl. Cryst.*, 2001, **34**, 210-213.
2. J. Qiao, L. Ning, M. S. Molokeev, Y.-C. Chuang, Q. Zhang, K. R. Poeppelmeier and Z. Xia, *Angew. Chem. Int. Ed.*, 2019, **58**, 11521-11526.
3. G. Zhou, Z. Liu, J. Huang, M. S. Molokeev, Z. Xiao, C. Ma and Z. Xia, *J. Phys. Chem. Lett.*, 2020, **11**, 5956-5962.
4. Y. Zhang, W. Q. Liao, D. W. Fu, H. Y. Ye, C. M. Liu, Z. N. Chen and R. G. Xiong, *Adv. Mater.*, 2015, **27**, 3942-3946.
5. Y. Zhang, W. Q. Liao, D. W. Fu, H. Y. Ye, Z. N. Chen and R. G. Xiong, *J. Am. Chem. Soc.*, 2015, **137**, 4928-4931.
6. L. Xu, J. X. Gao, X. G. Chen, X. N. Hua and W. Q. Liao, *Dalton Trans.*, 2018, **47**, 16995-17003.
7. Z. Wei, W. Q. Liao, Y. Y. Tang, P. F. Li, P. P. Li, H. Cai and R.-G. Xiong, *J. Am. Chem. Soc.*, 2018, **140**, 8110-8113.
8. H. Peng, B. Zou, Y. Guo, Y. Xiao, R. Zhi, X. Fan, M. Zou and J. Wang, *J. Mater. Chem. C*, 2020, **8**, 6488-6495.
9. C. Li, X. Bai, Y. Guo and B. Zou, *ACS Omega*, 2019, **4**, 8039-8045.
10. X. Bai, H. Zhong, B. Chen, C. Chen, J. Han, R. Zeng and B. Zou, *J. Phys. Chem. C*, 2018, **122**, 3130-3137.
11. Y. Qin, P. Tao, L. Gao, P. She, S. Liu, X. Li, F. Li, H. Wang, Q. Zhao, Y. Miao and W. Huang, *Adv. Optical Mater.*, 2019, **7**, 1801160.
12. H. Y. Ye, Q. Zhou, X. Niu, W. Q. Liao, D. W. Fu, Y. Zhang, Y. M. You, J. Wang, Z. N. Chen and R. G. Xiong, *J. Am. Chem. Soc.*, 2015, **137**, 13148-13154.
13. L. Li, L. Li, Q. Li, Y. Shen, S. Pan and J. Pan, *Transit Met. Chem.*, 2020, **45**, 413-421.
14. V. Morad, I. Cherninkh, L. Pottschacher, Y. Shynkarenko, S. Yakunin and M. V. Kovalenko, *Chem. Mater.*, 2019, **31**, 10161-10169.
15. T. Jiang, W. Ma, H. Zhang, Y. Tian, G. Lin, W. Xiao, X. Yu, J. Qiu, X. Xu, Y. Yang and D. Ju, *Adv. Funct. Mater.*, 2021, 2009973.
16. B. Su, M. S. Molokeev and Z. Xia, *J. Mater. Chem. C*, 2019, **7**, 11220-11226.
17. C. Jiang, N. Zhong, C. Luo, H. Lin, Y. Zhang, H. Peng and C. G. Duan, *Chem. Commun.*, 2017, **53**, 5954-5957.
18. M. Li, J. Zhou, M. S. Molokeev, X. Jiang, Z. Lin, J. Zhao and Z. Xia, *Inorg. Chem.*, 2019, **58**, 13464-13470.
19. L. J. Xu, C. Z. Sun, H. Xiao, Y. Wu and Z. N. Chen, *Adv. Mater.*, 2017, **29**, 1605739.
